# Supplementary material
Source: publisher site journal article supplement (https://www.dovepress.com/article/569963)
Supplement: Supplementary file 1 [file 569963_supplement%20materials_1.docx]

Table S Clinical characteristics of training cohort and testing cohort

| **Characteristics** | **Training Cohort (n=184)** | **Testing Cohort (n=79)** | ***P* value** |
| --- | --- | --- | --- |
| Age | 58.1 (8.17) | 58.0 (9.95) | 0.942 |
| Gender |  |  | 0.277 |
| Female | 69 (37.5%) | 36 (45.6%) |  |
| Male | 115 (62.5%) | 43 (54.4%) |  |
| Smoking |  |  | 0.168 |
| No | 160 (87.0%) | 74 (93.7%) |  |
| Yes | 24 (13.0%) | 5 (6.33%) |  |
| Drinking |  |  | 0.846 |
| No | 167 (90.8%) | 73 (92.4%) |  |
| Yes | 17 (9.24%) | 6 (7.59%) |  |
| ECOG |  |  | 0.487 |
| 0 | 24 (13.0%) | 11 (13.9%) |  |
| 1 | 157 (85.3%) | 65 (82.3%) |  |
| 2 | 3 (1.63%) | 3 (3.80%) |  |
| AJCC |  |  | 0.717 |
| III | 94 (51.1%) | 43 (54.4%) |  |
| IV | 90 (48.9%) | 36 (45.6%) |  |
| Histological Grade | |  | 0.449 |
| Well | 32 (17.4%) | 16 (20.3%) |  |
| Moderate-well | 12 (6.52%) | 6 (7.59%) |  |
| Moderately | 44 (23.9%) | 24 (30.4%) |  |
| Moderate-low | 24 (13.0%) | 5 (6.33%) |  |
| Poorly | 72 (39.1%) | 28 (35.4%) |  |
| Child Pugh Grade | |  | 0.221 |
| A | 77 (41.8%) | 26 (32.9%) |  |
| B | 107 (58.2%) | 53 (67.1%) |  |
| Tumor size (cm) | 6.00 [4.00;8.00] | 5.00 [3.50;7.00] | 0.022 |
| CEA (µg/L) |  |  | 0.39 |
| ＞4 | 91 (49.7%) | 34 (43.0%) |  |
| ≤4 | 92 (50.3%) | 45 (57.0%) |  |
| CA199 (U/mL) | |  | 0.073 |
| ＞20 | 63 (34.2%) | 37 (46.8%) |  |
| ≤20 | 121 (65.8%) | 42 (53.2%) |  |

Notes: CEA, Carcinoembryonic Antigen. CA19-9, Carbohydrate antigen 19-9. P< 0.05 is statistically significant.

Table S Relationship between different LDL-C and clinical characteristics of patients with advanced ICC

| **Characteristics** | **High Group (n=85)** | **Low Group (n=99)** | ***P* value** |
| --- | --- | --- | --- |
| **Age** | 59.0 [53.0;65.0] | 57.0 [51.0;65.0] | 0.461 |
| **Gender** |  |  | 0.423 |
| Female | 35 (41.2%) | 34 (34.3%) |  |
| Male | 50 (58.8%) | 65 (65.7%) |  |
| **Smoking** |  |  | 0.535 |
| No | 72 (84.7%) | 88 (88.9%) |  |
| Yes | 13 (15.3%) | 11 (11.1%) |  |
| **Drinking** |  |  | 1 |
| No | 77 (90.6%) | 90 (90.9%) |  |
| Yes | 8 (9.41%) | 9 (9.09%) |  |
| **ECOG** |  |  | 0.865 |
| 0 | 10 (11.8%) | 14 (14.1%) |  |
| 1 | 74 (87.1%) | 83 (83.8%) |  |
| 2 | 1 (1.18%) | 2 (2.02%) |  |
| **AJCC** |  |  | 0.75 |
| III | 45 (52.9%) | 49 (49.5%) |  |
| IV | 40 (47.1%) | 50 (50.5%) |  |
| **Histological grade** |  |  | 0.1 |
| Well | 13 (15.3%) | 19 (19.2%) |  |
| Moderate-well | 9 (10.6%) | 3 (3.03%) |  |
| Moderately | 15 (17.6%) | 29 (29.3%) |  |
| Moderate-low | 11 (12.9%) | 13 (13.1%) |  |
| Poorly | 37 (43.5%) | 35 (35.4%) |  |
| **Child-Pugh grade** |  |  | 0.222 |
| A | 31 (36.5%) | 46 (46.5%) |  |
| B | 54 (63.5%) | 53 (53.5%) |  |
| **Tumor size (mm)** | 7.00 [5.00;8.00] | 6.00 [4.00;8.00] | 0.094 |
| **CEA (µg/L)** |  |  | 0.608 |
| ＞4 | 44 (52.4%) | 47 (47.5%) |  |
| ≤4 | 40 (47.6%) | 52 (52.5%) |  |
| **CA199 (U/mL)** |  |  | 0.171 |
| ＞20 | 34 (40.0%) | 29 (29.3%) |  |
| ≤20 | 51 (60.0%) | 70 (70.7%) |  |

Notes: CEA, Carcinoembryonic Antigen. CA19-9, Carbohydrate antigen 19-9. P< 0.05 is statistically significant.

Table S3 Relationship between different HDL-C and clinical characteristics of patients with advanced ICC

| **Characteristics** | **High Group (n=96)** | **Low Group (n=88)** | ***P* value** |
| --- | --- | --- | --- |
| **Age** | 58.5 [51.0;65.0] | 58.5 [52.8;65.0] | 0.695 |
| **Gender** |  |  | 0.17 |
| Female | 41 (42.7%) | 28 (31.8%) |  |
| Male | 55 (57.3%) | 60 (68.2%) |  |
| **Smoking** |  |  | 0.078 |
| No | 88 (91.7%) | 72 (81.8%) |  |
| Yes | 8 (8.33%) | 16 (18.2%) |  |
| **Drinking** |  |  | 0.086 |
| No | 91 (94.8%) | 76 (86.4%) |  |
| Yes | 5 (5.21%) | 12 (13.6%) |  |
| **ECOG** |  |  | 0.69 |
| 0 | 14 (14.6%) | 10 (11.4%) |  |
| 1 | 80 (83.3%) | 77 (87.5%) |  |
| 2 | 2 (2.08%) | 1 (1.14%) |  |
| **AJCC** |  |  | 1 |
| III | 49 (51.0%) | 45 (51.1%) |  |
| IV | 47 (49.0%) | 43 (48.9%) |  |
| **Histological grade** |  |  | **0.028*** |
| Well | 19 (19.8%) | 13 (14.8%) |  |
| Moderate-well | 4 (4.17%) | 8 (9.09%) |  |
| Moderately | 21 (21.9%) | 23 (26.1%) |  |
| Moderate-low | 7 (7.29%) | 17 (19.3%) |  |
| Poorly | 45 (46.9%) | 27 (30.7%) |  |
| **Child-Pugh grade** |  |  | 0.424 |
| A | 37 (38.5%) | 40 (45.5%) |  |
| B | 59 (61.5%) | 48 (54.5%) |  |
| **Tumor size (cm)** | 6.00 [3.00;8.00] | 7.00 [5.00;8.00] | 0.124 |
| **CEA (µg/L)** |  |  | 1 |
| ＞4 | 48 (50.0%) | 43 (49.4%) |  |
| ≤4 | 48 (50.0%) | 44 (50.6%) |  |
| **CA199 (U/mL)** |  |  | 0.845 |
| ＞20 | 34 (35.4%) | 29 (33.0%) |  |
| ≤20 | 62 (64.6%) | 59 (67.0%) |  |

Notes: CEA, Carcinoembryonic Antigen. CA19-9, Carbohydrate antigen 19-9. *, *P* < 0.05. The P-values with statistical significance are displayed in bold.

Table S4 Relationship between different APOA1 and clinical characteristics of patients with advanced ICC

| **Characteristics** | **High Group (n=70)** | **Low Group (n=114)** | ***P* value** |
| --- | --- | --- | --- |
| **Age** | 57.5 [51.0;65.0] **#** | 59.0 [53.0;65.0] | 0.672 |
| **Gender** |  |  | 0.48 |
| Female | 29 (41.4%) | 40 (35.1%) |  |
| Male | 41 (58.6%) | 74 (64.9%) |  |
| **Smoking** |  |  | 0.102 |
| No | 65 (92.9%) | 95 (83.3%) |  |
| Yes | 5 (7.14%) | 19 (16.7%) |  |
| **Drinking** |  |  | 0.302 |
| No | 66 (94.3%) | 101 (88.6%) |  |
| Yes | 4 (5.71%) | 13 (11.4%) |  |
| **ECOG** |  |  | 0.065 |
| 0 | 7 (10.0%) | 17 (14.9%) |  |
| 1 | 60 (85.7%) | 97 (85.1%) |  |
| 2 | 3 (4.29%) | 0 (0.00%) |  |
| **AJCC** |  |  | 0.492 |
| III | 33 (47.1%) | 61 (53.5%) |  |
| IV | 37 (52.9%) | 53 (46.5%) |  |
| **Histological grade** |  |  | 0.379 |
| Well | 14 (20.0%) | 18 (15.8%) |  |
| Moderate-well | 4 (5.71%) | 8 (7.02%) |  |
| Moderately | 14 (20.0%) | 30 (26.3%) |  |
| Moderate-low | 6 (8.57%) | 18 (15.8%) |  |
| Poorly | 32 (45.7%) | 40 (35.1%) |  |
| **Child-Pugh grade** |  |  | 0.71 |
| A | 31 (44.3%) | 46 (40.4%) |  |
| B | 39 (55.7%) | 68 (59.6%) |  |
| **Tumor size (cm)** | 5.00 [3.00;7.00]**#** | 7.00 [5.00;8.00] | **0.01*** |
| **CEA (µg/L)** |  |  | 0.154 |
| ＞4 | 40 (57.1%) | 51 (45.1%) |  |
| ≤4 | 30 (42.9%) | 62 (54.9%) |  |
| **CA199 (U/mL)** |  |  | 0.881 |
| ＞20 | 23 (32.9%) | 40 (35.1%) |  |
| ≤20 | 47 (67.1%) | 74 (64.9%) |  |

Notes: CEA, Carcinoembryonic Antigen. CA19-9, Carbohydrate antigen 19-9. *, *P*< 0.05. The P-values with statistical significance are displayed in bold.

Table S5 Correlations of different levels of LDL-C、HDL-C and APOA1 with recent efficacy for testing cohort

| **Characteristics** | **PR (n=12)** | **SD (n=34)** | **PD (n=33)** | **DCR** | ***P* value** | **ORR** | ***P* value** |
| --- | --- | --- | --- | --- | --- | --- | --- |
| **LDL-C** |  |  |  |  | 0.85 |  | 0.76 |
| High Group | 5 (41.7%) | 17 (50.0%) | 18 (54.5%) | 55.00% |  | 12.50% |  |
| Low Group | 7 (58.3%) | 17 (50.0%) | 15 (45.5%) | 61.53% |  | 17.95% |  |
| **HDL-C** |  |  |  |  | 0.7 |  | 0.75 |
| High Group | 9 (75.0%) | 23 (67.6%) | 19 (57.6%) | 62.75% |  | 17.65% |  |
| Low Group | 3 (25.0%) | 11 (32.4%) | 14 (42.4%) | 50.00% |  | 10.71% |  |
| **APOA1** |  |  |  |  | 0.32 |  | 0.75 |
| High Group | 7 (58.3%) | 27 (79.4%) | 17 (51.5%) | 66.67% |  | 13.73% |  |
| Low Group | 5 (41.7%) | 7 (20.6%) | 16 (48.5%) | 42.86% |  | 17.86% |  |

**Notes:** DCR, Disease Control Rate. PD, Progressive Disease. PR, Partial Remission. SD, Stable Disease. ORR, Objective Response Rate. LDL-C, Low-Density Lipoprotein Cholesterol. HDL-C, High-Density Lipoprotein Cholesterol. APOA1, Apolipoprotein A1. *P* < 0.05 is statistically significant.

Table S6 Hosmer-Lemeshow testing of model

| X2 | df | *P* value |
| --- | --- | --- |
| 2.579 | 1 | 0.1083 |


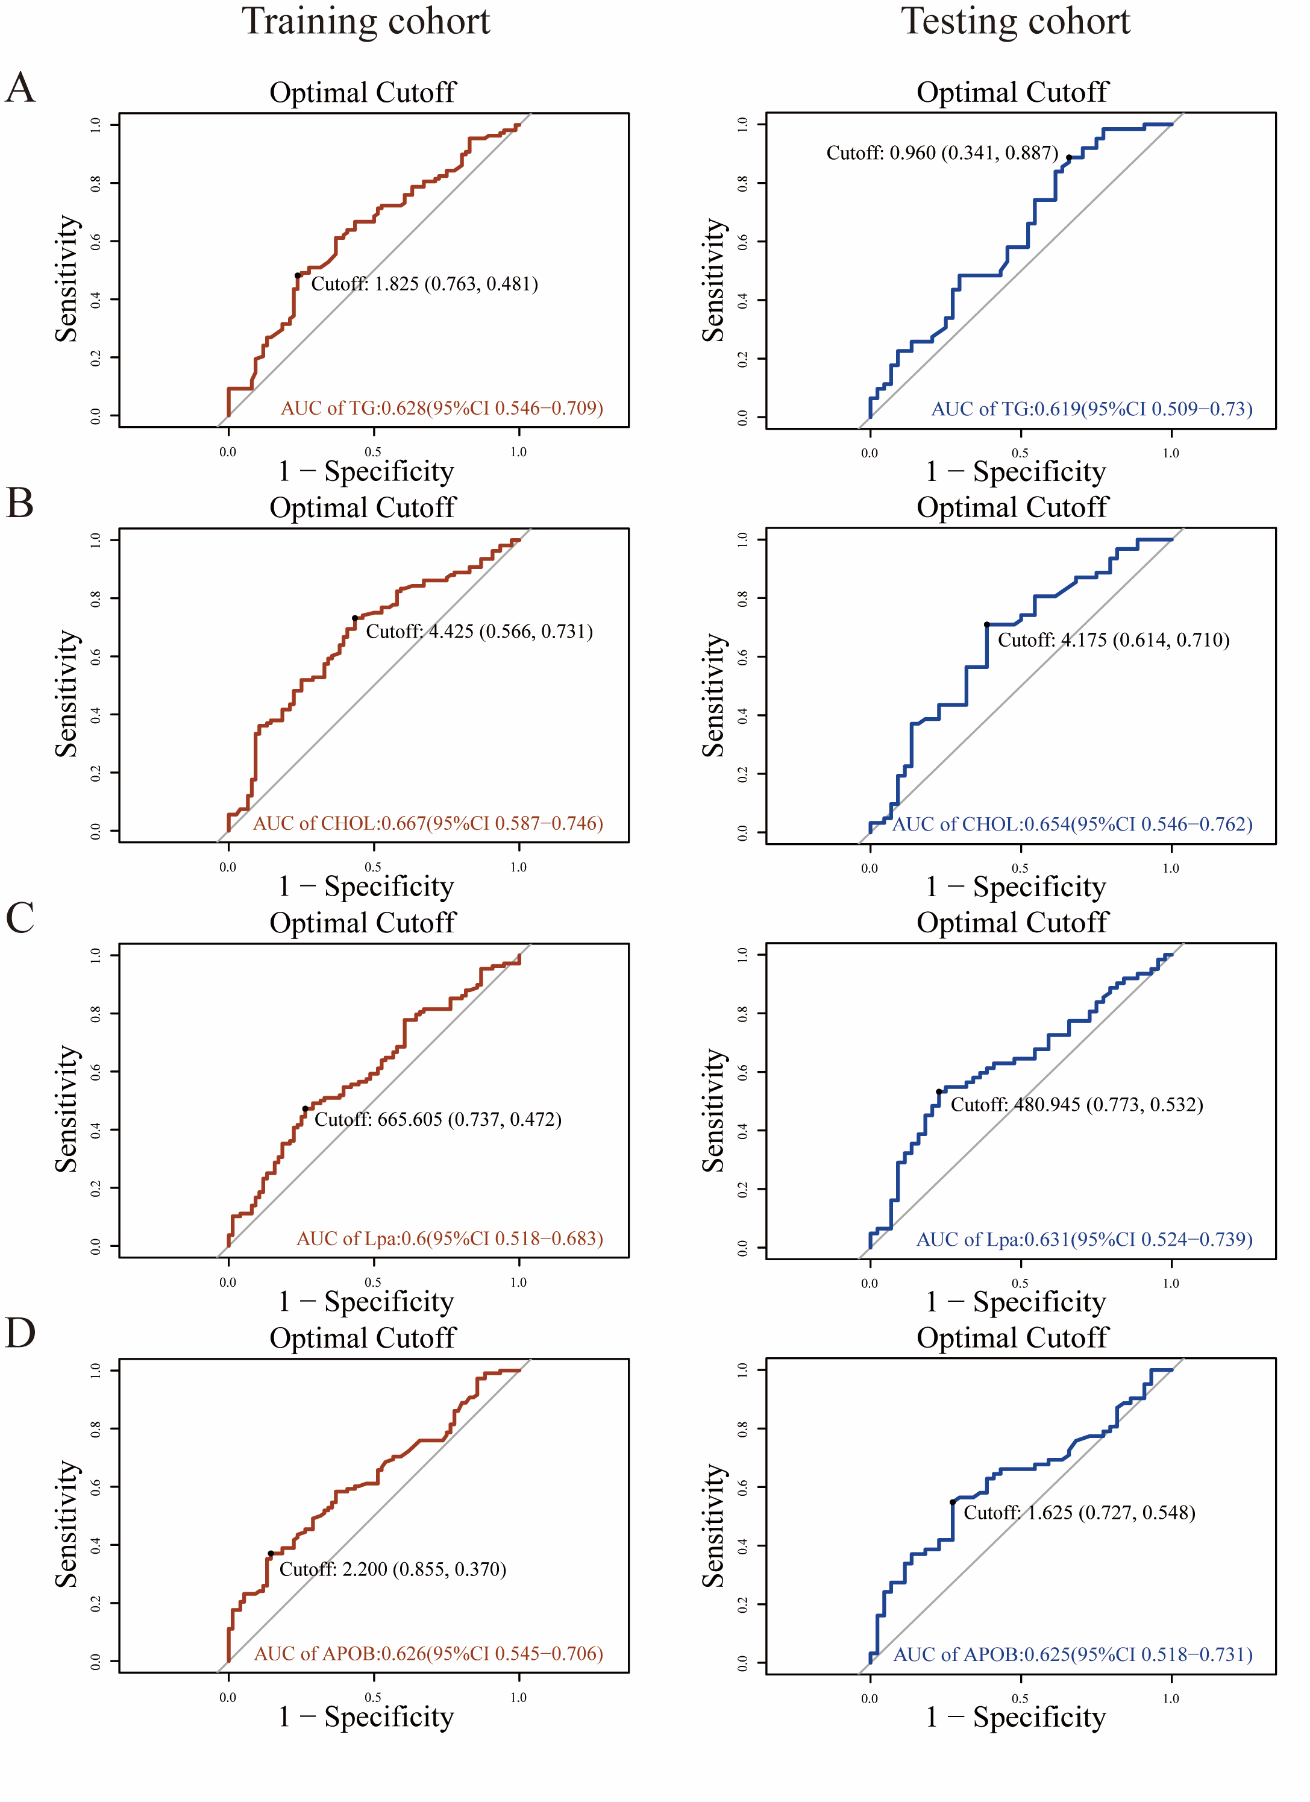


**Figure S1 The ROC curve of LDL-C、HDL-C and APOA1 A** The ROC curve of TG. **B** The ROC curve of CHOL. **C** The ROC curve of Lpa. **D** The ROC curve of APOB.


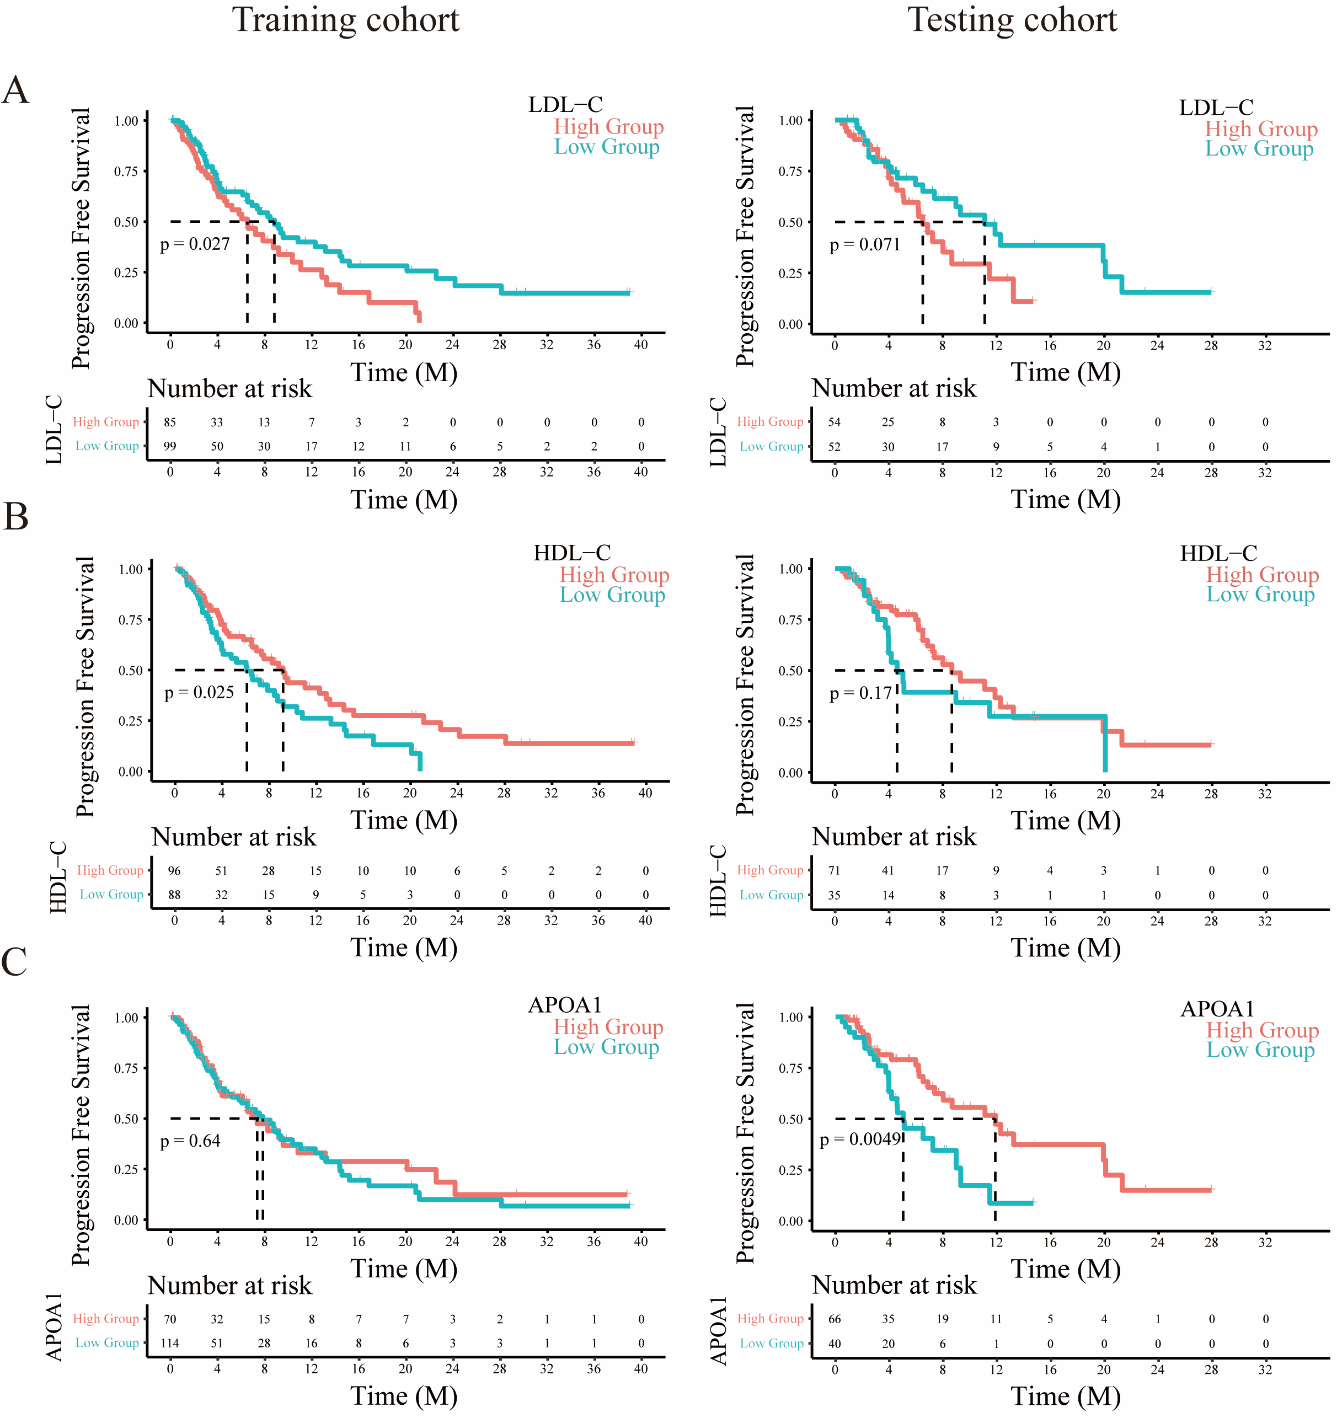


**Figure S2 Comparison of Kaplan-Meier curves of PFS between different levels of LDL-C, HDL-C and APOA1 for training cohort and testing cohort. A** Kaplan-Meier curves of PFS with LDL-C. **B** Kaplan-Meier curves of PFS with HDL-C. **C** Kaplan-Meier curves of PFS with APOA1.


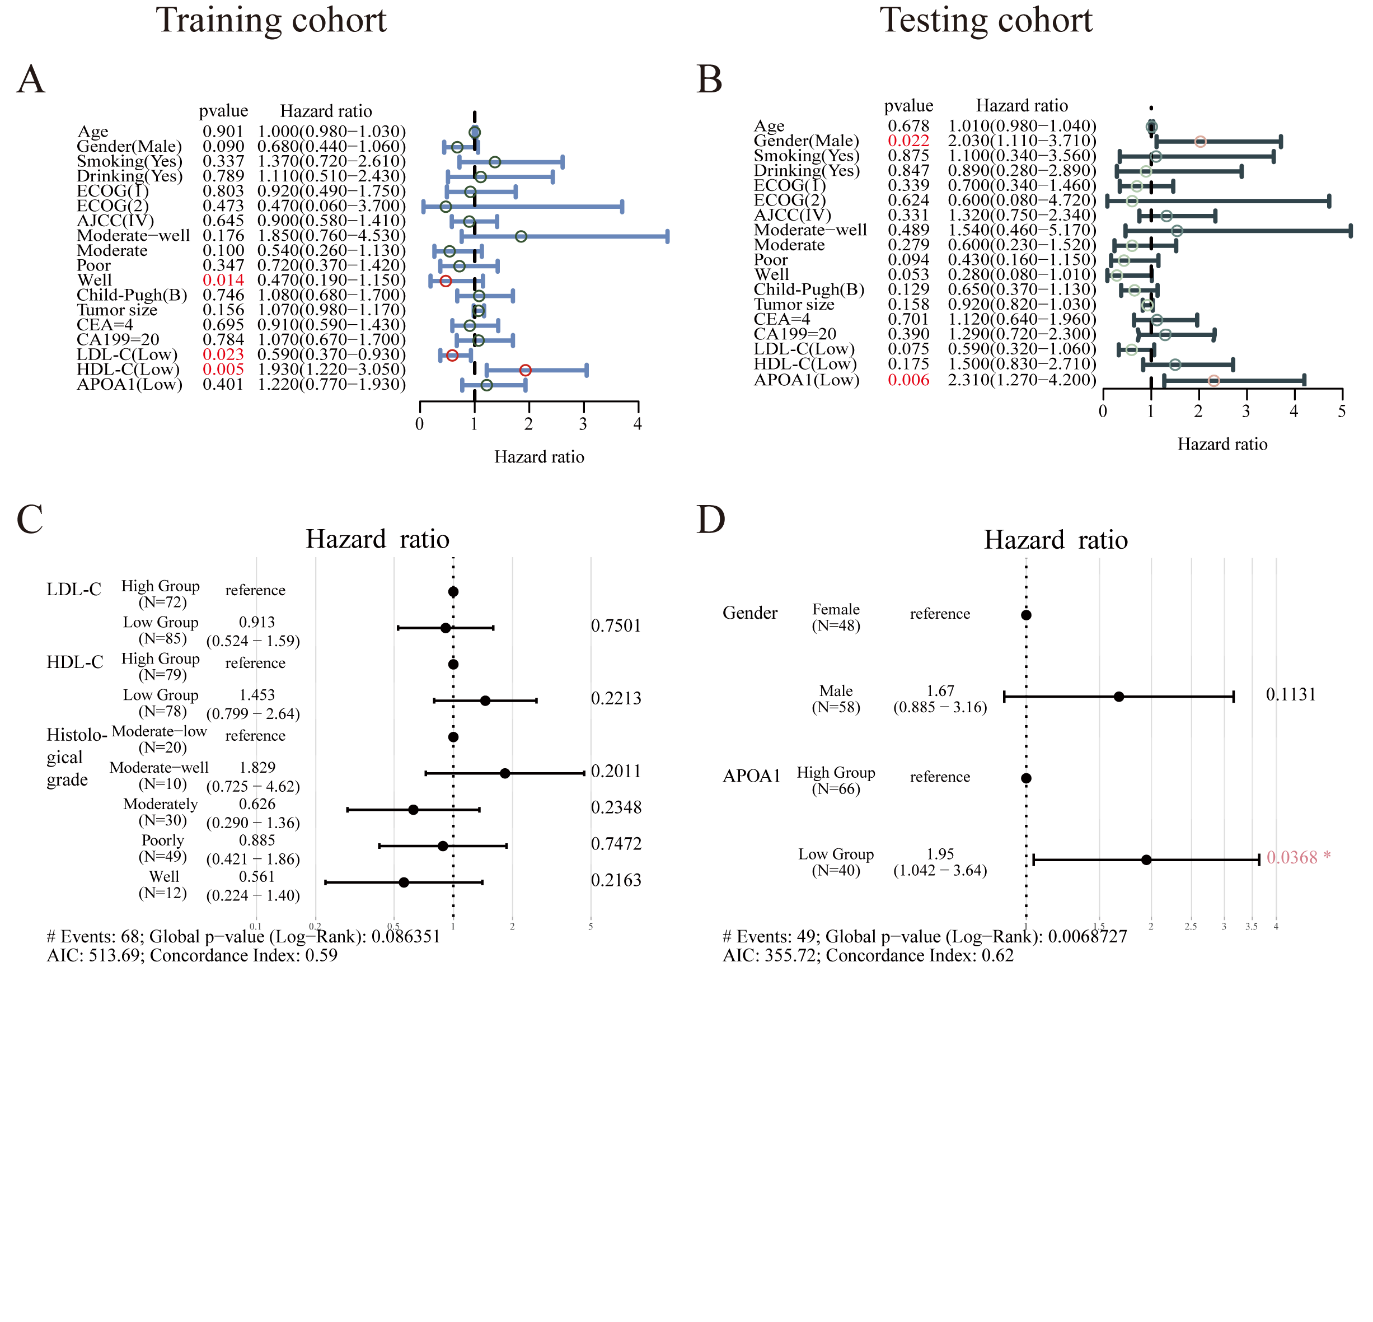


**Figure S3 COX regression analysis of PFS with advanced ICC for training cohort and testing cohort A** Univariate analysis of PFS for training cohort. **B** Univariate analysis of PFS for testing cohort. **C** Multivariate analysis of PFS for training cohort. **D** Multivariate analysis of PFS for testing cohort. **Notes:** colored text and *, p<0.05.
